# Supplementary material
Source: bioRxiv or medRxiv preprint supplement (https://www.biorxiv.org/highwire/filestream/117390/field_highwire_adjunct_files/0/386516-1.pdf)
Supplement: Supplementary file [file 386516-1.pdf]

## Supplementary Material

Integrated ‘omic’ analyses provide evidence that a *Ca. Accumulibacter phosphatis* strain performs denitrification under micro-aerobic conditions

*Pamela Y. Camejo<sup>1</sup>, Ben O. Oyserman<sup>1</sup>, Katherine D. McMahon<sup>1,2</sup>, Daniel R. Noguera<sup>1,\*</sup>*

<sup>1</sup>Department of Civil and Environmental Engineering, University of Wisconsin - Madison, Madison, WI, USA

<sup>2</sup>Department of Bacteriology, University of Wisconsin - Madison, Madison, WI, USA

## Supplementary Figures

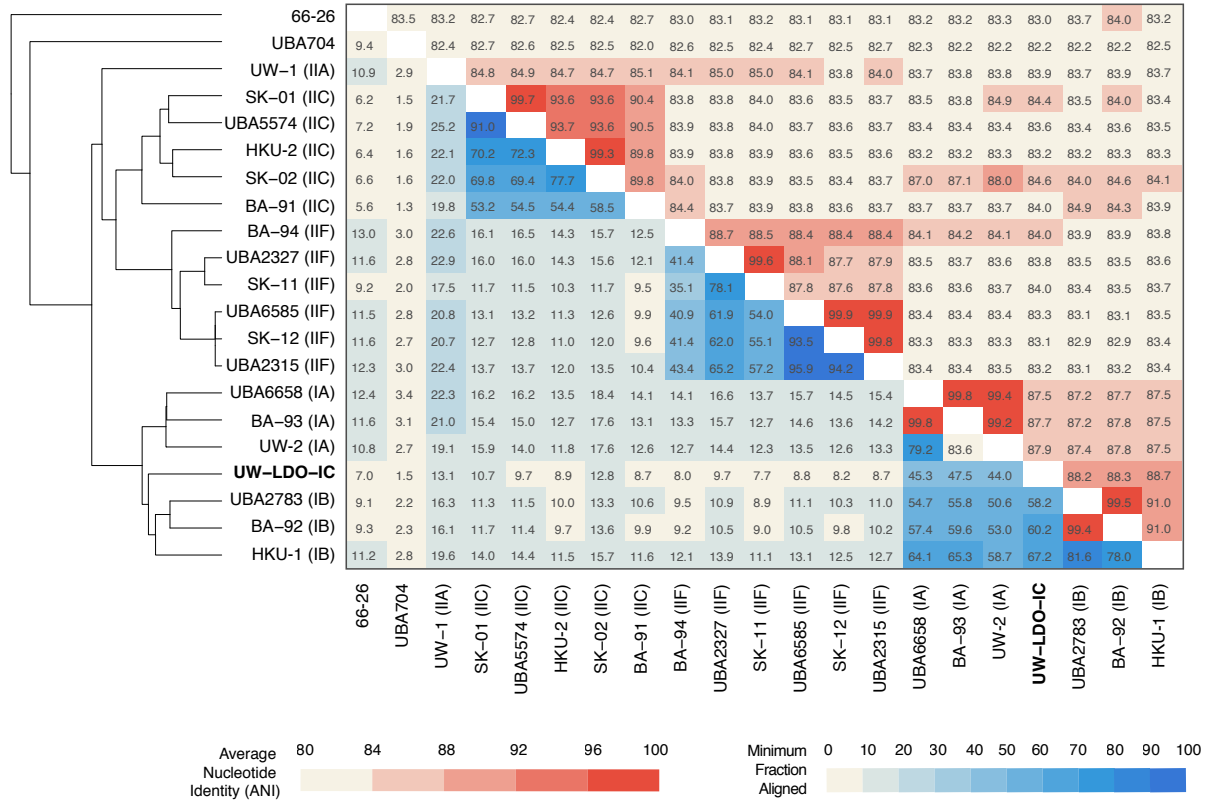

**Figure S1.** Comparison of the genome-wide average nucleotide identity and alignment percentage, of Accumulibacter-like genomes. The heatmap shows the average nucleotide identity (red low section of matrix) and the minimum percentage of the two genomes that aligned (blue upper section).

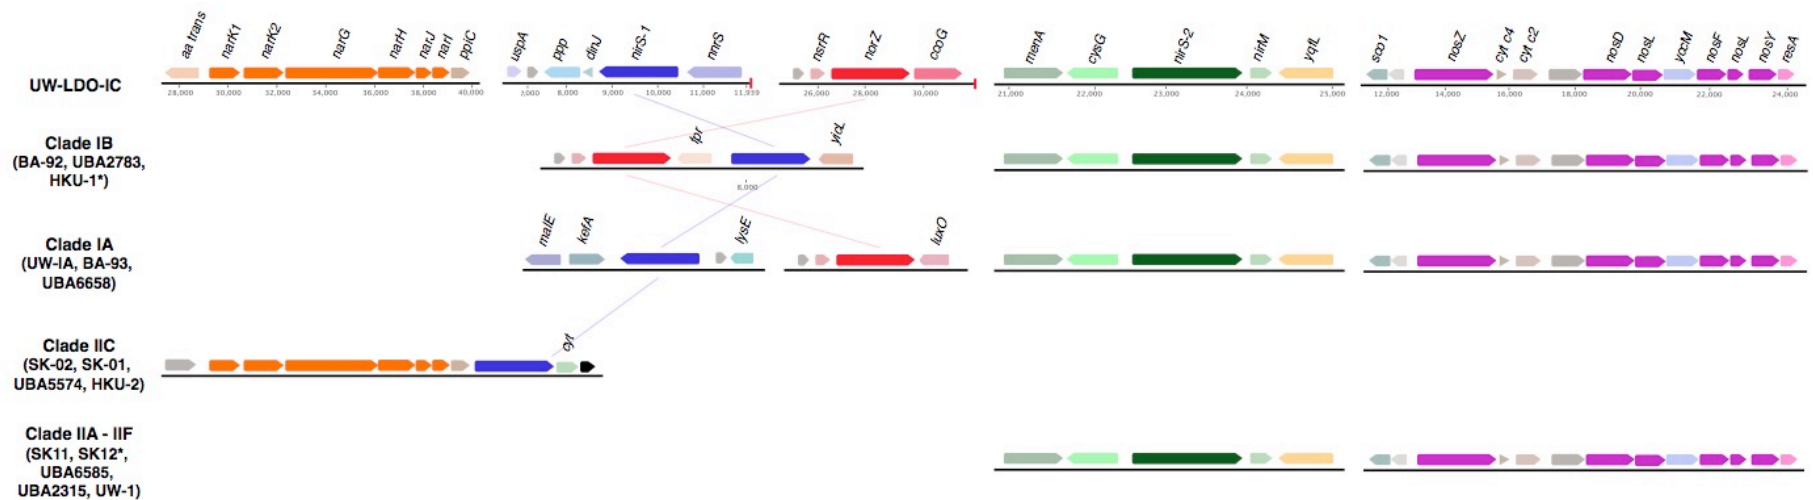

**Figure S2.** Schematic illustration of denitrifying genes loci in different genomes of *Accumulibacter*. Changes in the position of homologous genes are indicated by lines, the arrows show direction of transcription. Genes are drawn to scale. Proteins with unknown function are colored grey and transposases black. End of a scaffold is indicated with a red line. *aa trans*, aminoacid carrier family; *nar*, nitrate reductase; *ppiC*, peptidyl-prolyl cis-trans isomerase C; *uspA*, universal stress protein A, *ppp*, protein phosphatase; *dinJ*, DNA-damage-inducible protein J, *nir*, nitrite reductase; *nsrR*, Nitric oxie-sensitive repressor; *nor*, nitric oxide reductase; *ccoG*, type cbb3 cytochrome oxidase biogenesis protein; *menA*, 1,4-dihydroxy-2-naphthoate octaprenyltransferase; *cysG*, siroheme synthase; *yqjL*, ATP/GTP-binding protein; *sco1*, cytochrome c oxidase biogenesis protein; *nos*, nitrous oxide reductase; *cyt*, cytochrome; *resA*, cytochrome c-type biogenesis protein; *fpr*, Ferredoxin—NADP reductase; *yicL*, carboxylate/amino acid/amine transporter; *malE*, carboxylate/amino acid/amine transporter; *kefA*, potassium efflux system protein; *lysE*, L-lysine exporter family protein; *luxO*, two-component signal response regulator.  
\*Genome lacks one of the scaffolds.

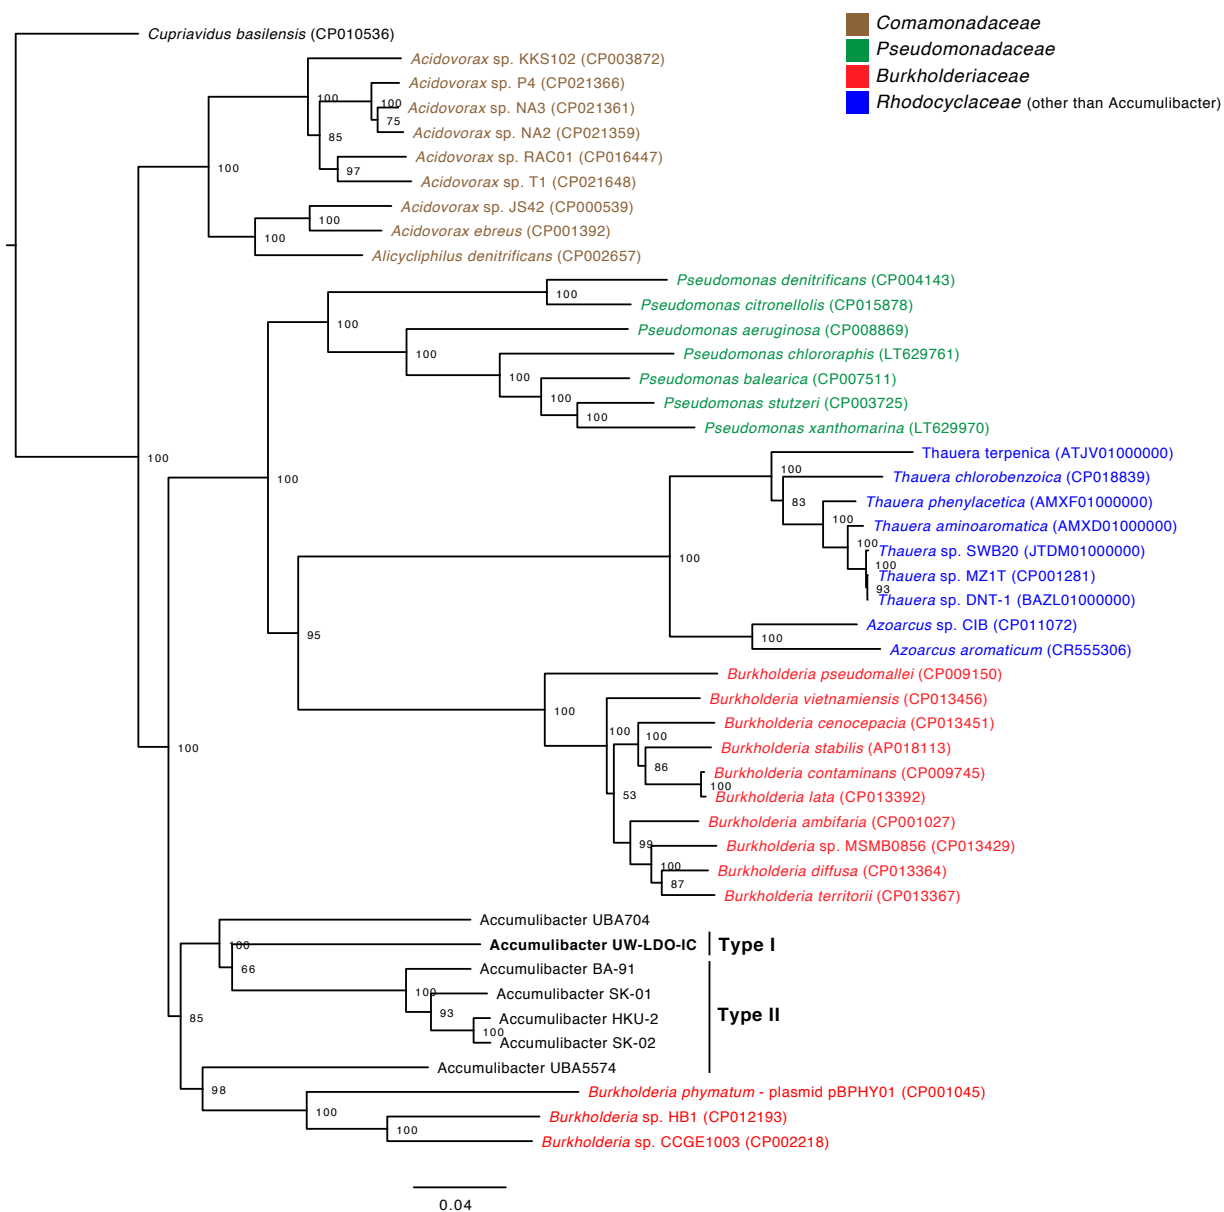

**Figure S3.** Neighbor-joining phylogenetic tree based on the full-length nucleic acid sequences of homologs to *narG* found in the genome of Accumulibacter and annotated genomes in NCBI. Bootstrap values are shown in the tree branches based on 1000 bootstrap replicates. The scale bar represents the number of nucleotide substitutions per site.

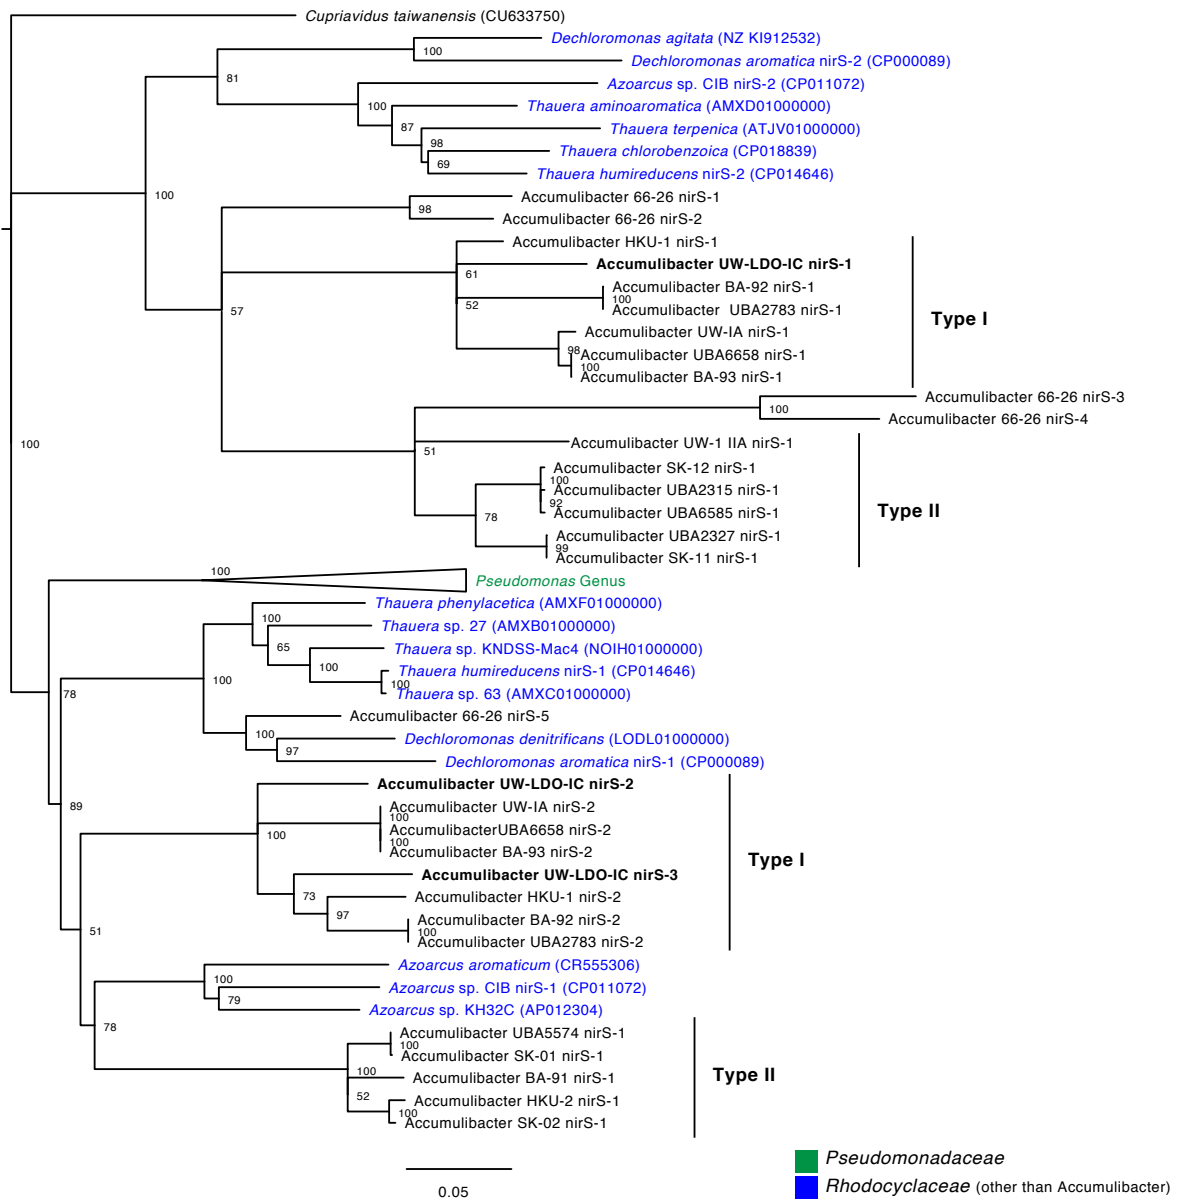

**Figure S4.** Neighbor-joining phylogenetic tree based on the full-length nucleic acid sequences of homologs to *nirS* found in the genome of *Accumulibacter* and annotated genomes in NCBI. Bootstrap values are shown in the tree branches based on 1000 bootstrap replicates. The scale bar represents the number of nucleotide substitutions per site.

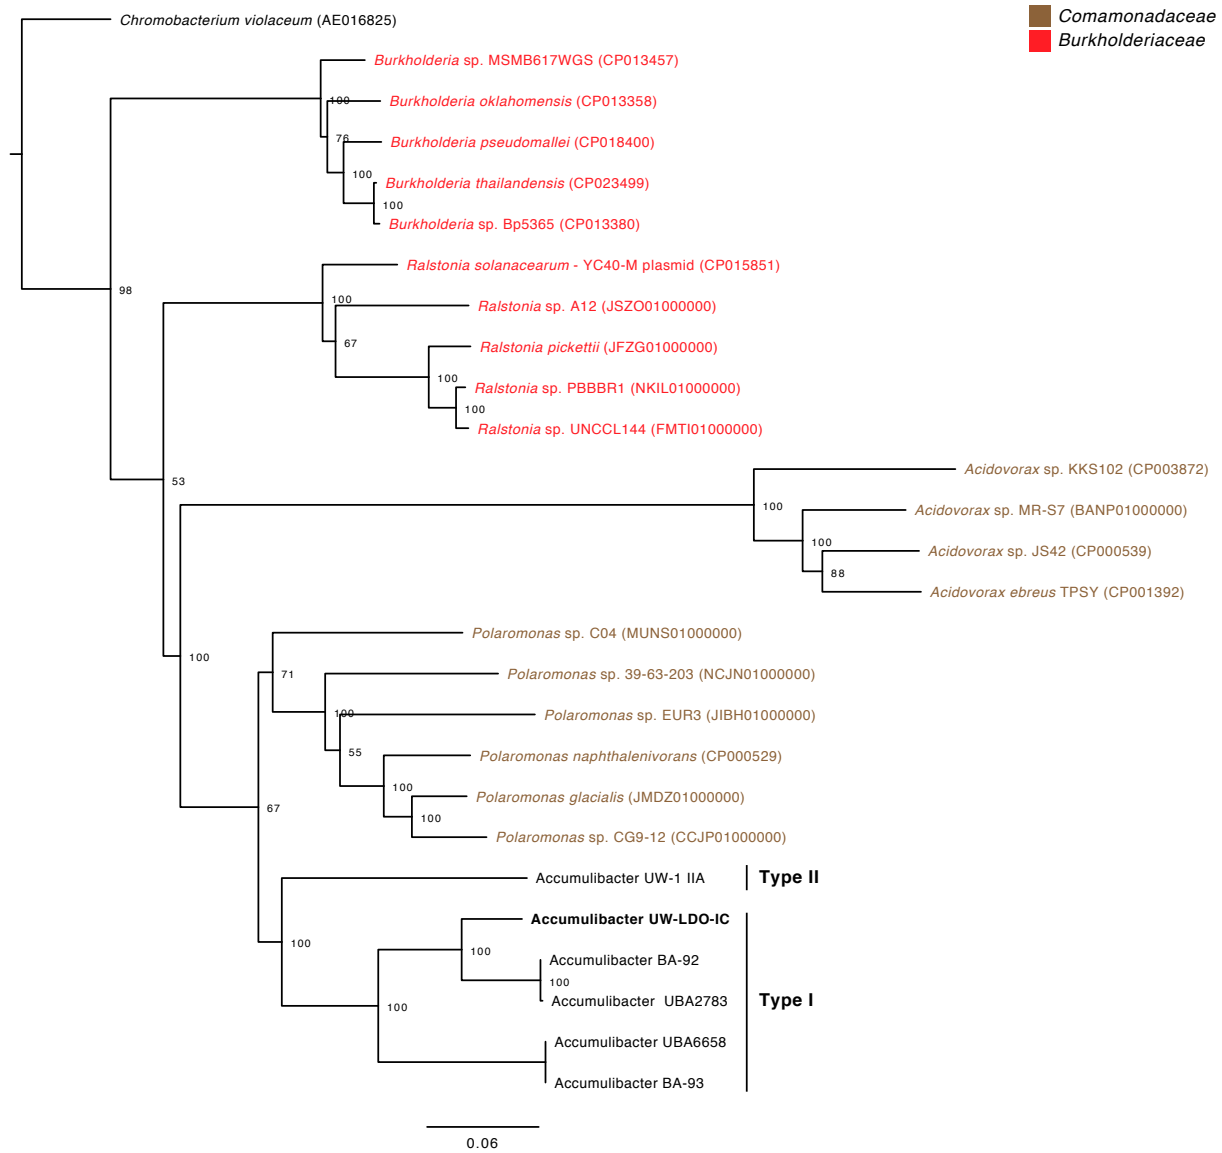

**Figure S5.** Neighbor-joining phylogenetic tree based on the full-length nucleic acid sequences of homologs to *norZ* found in the genome of *Accumulibacter* and annotated genomes in NCBI. Bootstrap values are shown in the tree branches based on 1000 bootstrap replicates. The scale bar represents the number of nucleotide substitutions per site.

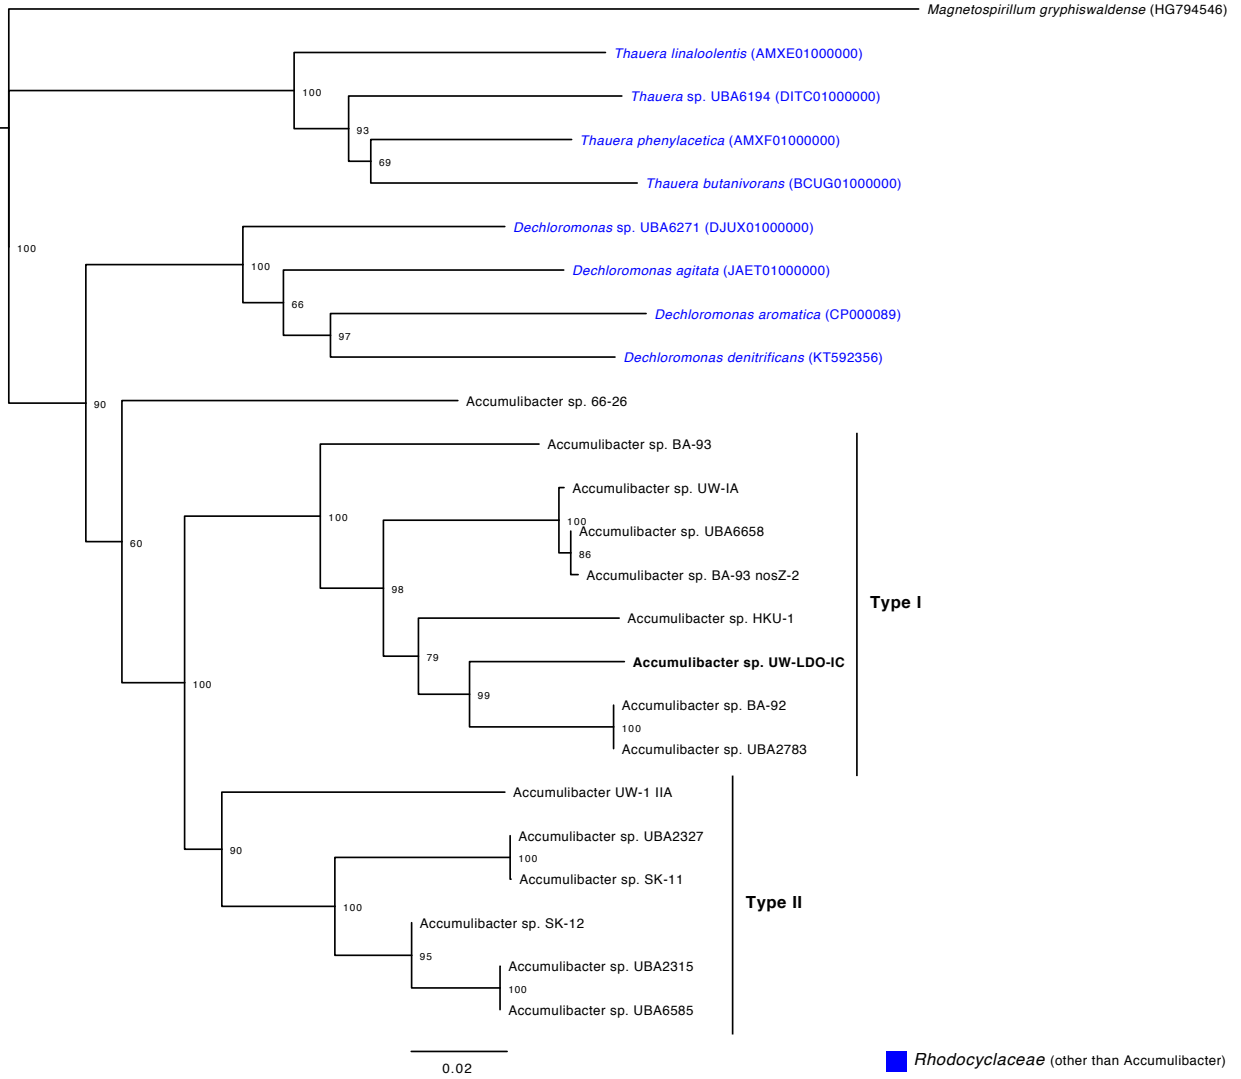

**Figure S6.** Neighbor-joining phylogenetic tree based on the full-length nucleic acid sequences of homologs to *nosZ* found in the genome of *Accumulibacter* and annotated genomes in NCBI. Bootstrap values are shown in the tree branches based on 1000 bootstrap replicates. The scale bar represents the number of nucleotide substitutions per site.

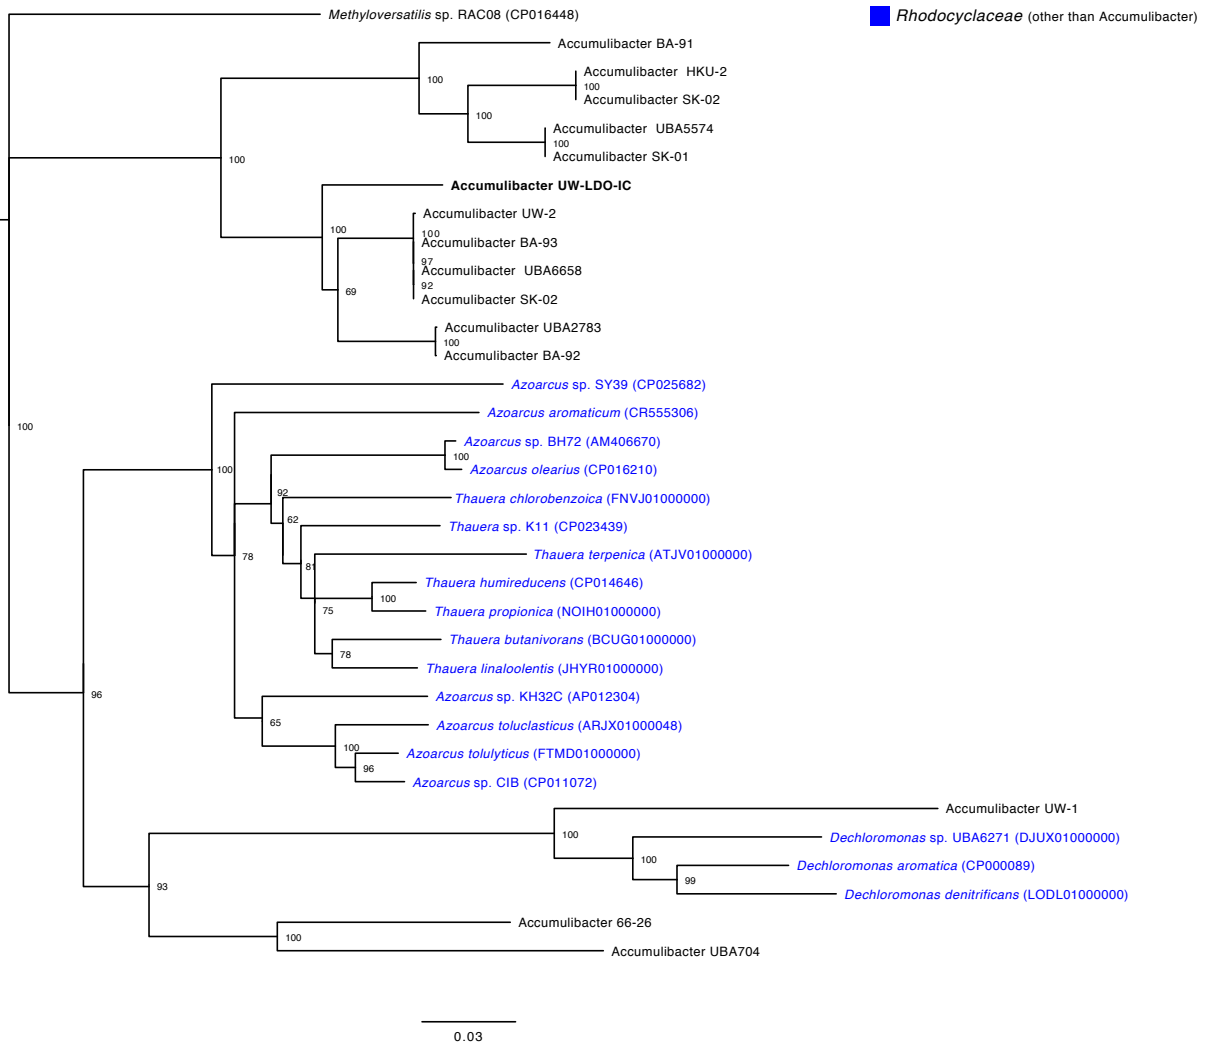

**Figure S7.** Neighbor-joining phylogenetic tree based on the full-length nucleic acid sequences of homologs to the cytochrome c oxidase *aa3* subunit I (*ctaD*), found in the genome of *Accumulibacter* and annotated genomes in NCBI. Bootstrap values are shown in the tree branches based on 1000 bootstrap replicates. The scale bar represents the number of nucleotide substitutions per site.



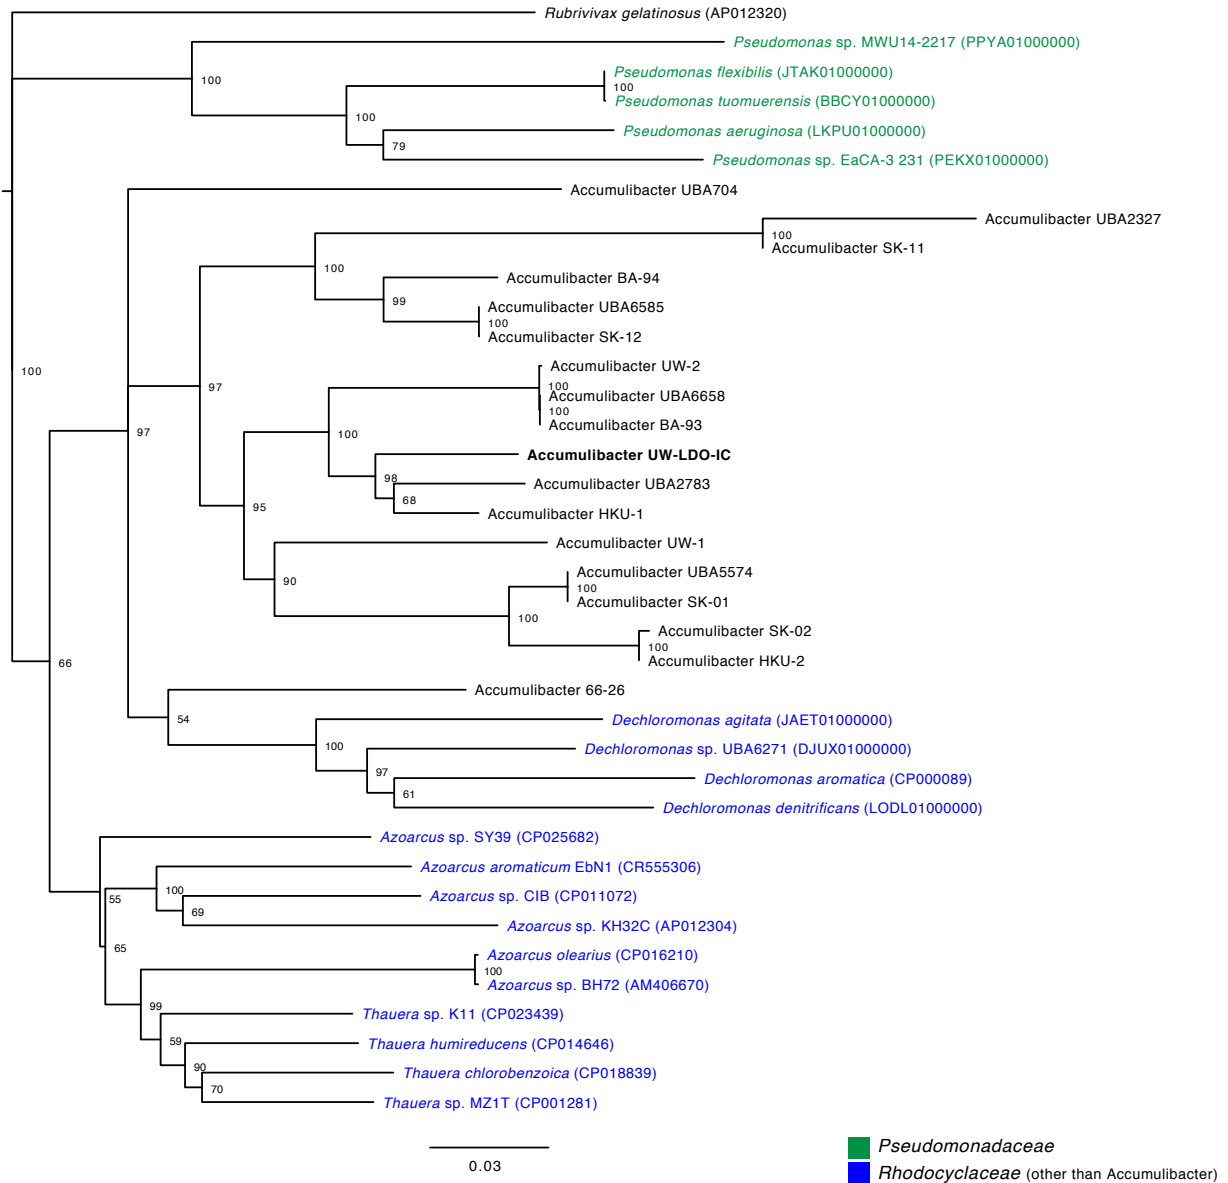

**Figure S8.** Neighbor-joining phylogenetic tree based on the full-length nucleic acid sequences of homologs to the cytochrome c oxidase *cbb3* subunit I (*ccoN*), found in the genome of *Accumulibacter* and annotated genomes in NCBI. Bootstrap values are shown in the tree branches based on 1000 bootstrap replicates. The scale bar represents the number of nucleotide substitutions per site.

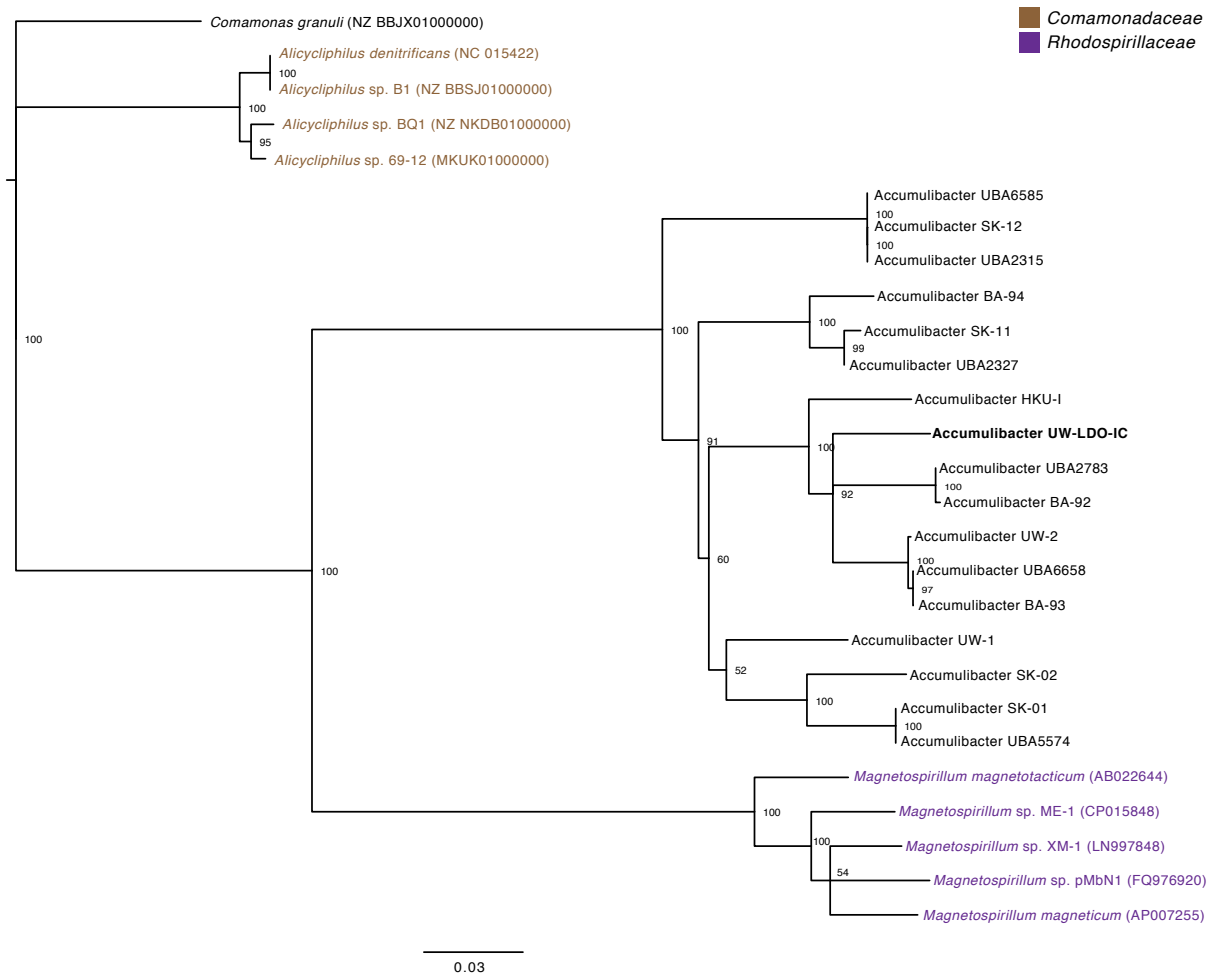

**Figure S9.** Neighbor-joining phylogenetic tree based on the full-length nucleic acid sequences of homologs to the cytochrome c oxidase  $ba_3$  subunit I (*cbaA*), found in the genome of *Accumulibacter* and annotated genomes in NCBI. Bootstrap values are shown in the tree branches based on 1000 bootstrap replicates. The scale bar represents the number of nucleotide substitutions per site.

## Supplementary Tables

**Table S1.** Bins assembled from metagenomic sample from day-522, taxonomic classification based on PhyloSift and metrics from CHECKM.

| Bin Id    | Lowest Assigned Taxonomy Rank                                                                   | GC (%) | Genome size (Mbp) | # Scaffolds | N50       | Completeness (%) | Redundancy (%) | Strain heterogeneity (%) | Mean Coverage 522-day |
|-----------|-------------------------------------------------------------------------------------------------|--------|-------------------|-------------|-----------|------------------|----------------|--------------------------|-----------------------|
| Bin 001   | Unresolved                                                                                      | 60.3   | 0.15              | 5           | 133,274   | 0.0              | 0.0            | 0.0                      | 1.75                  |
| Bin 002   | Bacteria; Proteobacteria; Gammaproteobacteria; Chromatiales; Ectothiorhodospiraceae             | 58.1   | 1.88              | 95          | 32,415    | 70.1             | 0.5            | 0.0                      | 7.93                  |
| Bin 003   | Bacteria; Proteobacteria; Gammaproteobacteria                                                   | 57.9   | 1.19              | 104         | 19,456    | 18.9             | 0.0            | 0.0                      | 4.67                  |
| Bin 004   | Unresolved                                                                                      | 61.4   | 0.46              | 71          | 9,751     | 0.0              | 0.0            | 0.0                      | 1.62                  |
| Bin 005   | Unresolved                                                                                      | 53.2   | 0.44              | 90          | 8,194     | 0.0              | 0.0            | 0.0                      | 1.34                  |
| Bin 006   | Unresolved                                                                                      | 60.8   | 0.44              | 117         | 5,609     | 4.2              | 0.0            | 0.0                      | 1.26                  |
| Bin 007   | Unresolved                                                                                      | 55.0   | 0.32              | 59          | 10,982    | 0.0              | 0.0            | 0.0                      | 0.52                  |
| Bin 008   | Bacteria; Verrucomicrobia                                                                       | 62.6   | 3.88              | 26          | 501,618   | 96.8             | 3.4            | 0.0                      | 5.61                  |
| Bin 009   | Unresolved                                                                                      | 45.2   | 0.23              | 59          | 5,784     | 0.0              | 0.0            | 0.0                      | 0.26                  |
| Bin 010   | Bacteria; Bacteroidetes; Sphingobacteriia; Sphingobacteriales; Saprospiraceae; Lewinella        | 55.6   | 2.21              | 24          | 176,250   | 39.7             | 0.0            | 0.0                      | 2.28                  |
| Bin 011   | Bacteria; Bacteroidetes; Sphingobacteriia; Sphingobacteriales; Saprospiraceae; Lewinella        | 54.7   | 2.10              | 23          | 127,440   | 31.0             | 0.0            | 0.0                      | 2.23                  |
| Bin 012   | Bacteria                                                                                        | 62.0   | 2.81              | 50          | 2,659,120 | 94.9             | 1.9            | 0.0                      | 2.91                  |
| Bin 013   | Bacteria; Proteobacteria; Alphaproteobacteria; Rhodobacterales; Hyphomonadaceae                 | 45.3   | 2.85              | 67          | 182,623   | 97.6             | 1.0            | 25.0                     | 1.97                  |
| Bin 014   | Bacteria; Proteobacteria                                                                        | 58.4   | 1.44              | 299         | 7,814     | 1.8              | 0.0            | 0.0                      | 0.92                  |
| Bin 015   | Bacteria; Chloroflexi; Caldilineae; Caldilineales; Caldilineaceae; Caldilinea                   | 64.3   | 5.77              | 307         | 38,066    | 92.3             | 1.1            | 0.0                      | 3.36                  |
| Bin 016   | Bacteria; Proteobacteria; Alphaproteobacteria; Rhodospirillales; Rhodospirillaceae              | 67.7   | 5.05              | 273         | 46,256    | 98.3             | 37.7           | 0.9                      | 2.76                  |
| Bin 017   | Bacteria; Bacteroidetes; Flavobacteriia; Flavobacteriales; Cryomorphaeae; Fluvicola; Fluvicola  | 60.8   | 3.85              | 87          | 78,231    | 98.9             | 0.2            | 0.0                      | 1.92                  |
| Bin 018   | Bacteria; Proteobacteria; Betaproteobacteria; Rhodocyclales; Rhodocyclaceae; Dechloromonas      | 63.8   | 2.65              | 439         | 11,996    | 47.8             | 5.5            | 54.2                     | 1.20                  |
| Bin 019   | Bacteria; Bacteroidetes; Cytophagia; Cytophagales; Flammeovirgaceae; Fulvivirga                 | 42.5   | 4.32              | 79          | 1,137,187 | 98.8             | 2.1            | 11.1                     | 1.85                  |
| Bin 020   | Bacteria; Proteobacteria; Alphaproteobacteria; Rhodospirillales; Rhodospirillaceae              | 69.9   | 2.47              | 54          | 101,360   | 75.2             | 0.0            | 0.0                      | 1.00                  |
| Bin 021   | Bacteria; Proteobacteria; Alphaproteobacteria; Rhizobiales; Beijerinckiaceae; Beijerinckia      | 67.0   | 3.41              | 33          | 246,859   | 99.1             | 1.0            | 0.0                      | 1.26                  |
| Bin 022   | Bacteria; Proteobacteria; Alphaproteobacteria; Rhodospirillales                                 | 68.9   | 1.25              | 258         | 8,604     | 17.2             | 0.0            | 0.0                      | 0.43                  |
| Bin 023   | Bacteria                                                                                        | 57.0   | 3.53              | 178         | 329,776   | 95.4             | 2.8            | 0.0                      | 1.10                  |
| Bin 024   | Bacteria                                                                                        | 34.8   | 6.28              | 239         | 74,362    | 94.6             | 2.0            | 0.0                      | 1.74                  |
| Bin 025   | Bacteria; Proteobacteria; Gammaproteobacteria; Chromatiales                                     | 57.4   | 5.28              | 158         | 369,154   | 100.0            | 6.9            | 94.1                     | 1.30                  |
| Bin 026   | Bacteria; Bacteroidetes; Flavobacteriia; Bacteroidetes                                          | 46.3   | 4.59              | 94          | 88,733    | 97.0             | 2.5            | 0.0                      | 1.07                  |
| Bin 027   | Bacteria; Proteobacteria; Alphaproteobacteria; Caulobacterales; Caulobacteraceae; Brevundimonas | 66.6   | 2.70              | 220         | 22,667    | 99.0             | 7.0            | 78.3                     | 0.53                  |
| Bin 028   | Bacteria; Proteobacteria; Alphaproteobacteria; Rhizobiales                                      | 67.2   | 3.50              | 590         | 11,319    | 75.9             | 10.3           | 20.0                     | 0.67                  |
| Bin 029   | Bacteria; Bacteroidetes; Cytophagia; Cytophagales; Flammeovirgaceae; Fulvivirga                 | 42.1   | 4.68              | 90          | 246,705   | 99.7             | 1.6            | 0.0                      | 0.77                  |
| Bin 030   | Bacteria; Proteobacteria; Gammaproteobacteria                                                   | 56.6   | 3.64              | 70          | 129,915   | 93.1             | 29.7           | 34.8                     | 0.62                  |
| Bin 031.1 | Bacteria; Proteobacteria; Gammaproteobacteria                                                   | 59.6   | 2.81              | 84          | 166,389   | 72.7             | 2.3            | 0.0                      | 0.44                  |

Completeness, redundancy and strain heterogeneity were assessed with CHECKM 0.7.1, according to the presence of 43 single-copy reference gene. Bins designated as “Bin XXX.X” were generated using anvi'o (*See Methods*).

**Table S1.** Bins assembled from metagenomic sample from day-522, taxonomic classification based on PhyloSift and metrics from CHECKM (*Cont*).

| Bin Id    | Lowest Assigned Taxonomy Rank                                                                          | GC (%) | Genome size (Mbp) | # Scaffolds | N50     | Completeness (%) | Redundancy (%) | Strain heterogeneity (%) | Mean Coverage 522-day |
|-----------|--------------------------------------------------------------------------------------------------------|--------|-------------------|-------------|---------|------------------|----------------|--------------------------|-----------------------|
| Bin 031.2 | Bacteria; Proteobacteria; Gammaproteobacteria; Chromatiales                                            | 59.4   | 1.84              | 256         | 14,316  | 28.7             | 4.5            | 25.9                     | 0.28                  |
| Bin 032   | Bacteria; Ignavibacteriae; Ignavibacteria; Ignavibacteriales; Ignavibacteriaceae; Ignavibacterium      | 39.2   | 4.42              | 103         | 113,436 | 98.3             | 0.6            | 0.0                      | 0.68                  |
| Bin 033   | Bacteria; Proteobacteria; Alphaproteobacteria; Rhizobiales                                             | 65.4   | 4.46              | 333         | 153,360 | 98.3             | 25.5           | 34.2                     | 0.63                  |
| Bin 034   | Bacteria; Proteobacteria; Gammaproteobacteria                                                          | 62.3   | 4.47              | 586         | 24,795  | 87.9             | 40.3           | 14.4                     | 0.64                  |
| Bin 035   | Bacteria; Verrucomicrobia; Verrucomicrobiae; Verrucomicrobiales; Verrucomicrobiaceae; Verrucomicrobium | 58.7   | 8.63              | 310         | 173,586 | 99.3             | 8.8            | 8.7                      | 1.03                  |
| Bin 036   | Bacteria; Proteobacteria; Alphaproteobacteria; Rhodospirillales; Rhodospirillaceae                     | 55.6   | 2.96              | 213         | 37,364  | 96.8             | 11.3           | 0.0                      | 0.35                  |
| Bin 037   | Bacteria; Proteobacteria; Alphaproteobacteria; Rhizobiales; Methylobacteriaceae                        | 63.0   | 4.94              | 243         | 569,899 | 98.3             | 37.0           | 16.8                     | 0.59                  |
| Bin 038.2 | Bacteria; Proteobacteria; Betaproteobacteria; Rhodocyclales; Rhodocyclaceae; Thauera                   | 69.6   | 1.90              | 252         | 12,628  | 63.2             | 1.8            | 100.0                    | 0.30                  |
| Bin 038.3 | Bacteria; Proteobacteria; Betaproteobacteria; Rhodocyclales; Rhodocyclaceae; Thauera                   | 70.7   | 2.69              | 589         | 7,493   | 22.3             | 7.0            | 50.0                     | 0.27                  |
| Bin 039   | Bacteria; Proteobacteria; Betaproteobacteria; Gallionellales; Gallionellaceae; Gallionella             | 49.6   | 2.19              | 536         | 5,330   | 85.7             | 5.0            | 84.2                     | 0.26                  |
| Bin 040   | Bacteria; Verrucomicrobia; Verrucomicrobiae; Verrucomicrobiales; Verrucomicrobiaceae; Verrucomicrobium | 60.8   | 7.21              | 277         | 52,427  | 93.6             | 6.9            | 65.2                     | 0.83                  |
| Bin 041   | Bacteria; Proteobacteria; Alphaproteobacteria; Rhodospirillales; Rhodospirillaceae; Rhodospirillum     | 64.9   | 3.95              | 176         | 197,681 | 100.0            | 18.2           | 11.1                     | 0.43                  |
| Bin 042   | Bacteria; Proteobacteria; Deltaproteobacteria                                                          | 33.1   | 3.29              | 61          | 629,816 | 96.1             | 0.7            | 0.0                      | 0.34                  |
| Bin 043   | Bacteria                                                                                               | 51.5   | 3.15              | 90          | 221,518 | 95.3             | 4.8            | 66.7                     | 0.32                  |
| Bin 044   | Bacteria; Actinobacteria; Actinobacteria; Acidimicrobiales                                             | 72.7   | 5.44              | 558         | 294,835 | 99.2             | 13.3           | 0.0                      | 0.54                  |
| Bin 045   | Bacteria; Proteobacteria; Betaproteobacteria; Nitrosomonadales; Nitrosomonadaceae; Nitrosomonas        | 49.4   | 2.86              | 296         | 16,241  | 88.3             | 2.7            | 64.3                     | 0.28                  |
| Bin 046   | Bacteria; Proteobacteria; Betaproteobacteria; Rhodocyclales; Rhodocyclaceae; Accumulibacter phosphatis | 62.6   | 6.60              | 666         | 23,909  | 94.8             | 28.9           | 20.3                     | 0.64                  |
| Bin 047   | Bacteria; Proteobacteria; Gammaproteobacteria; Chromatiales                                            | 63.9   | 4.39              | 782         | 13,343  | 79.7             | 21.9           | 27.9                     | 0.39                  |
| Bin 048   | Bacteria; Proteobacteria; Alphaproteobacteria; Rhodospirillales; Rhodospirillaceae                     | 68.6   | 4.24              | 262         | 119,328 | 90.6             | 8.6            | 0.0                      | 0.39                  |
| Bin 049.1 | Bacteria; Proteobacteria; Betaproteobacteria; Rhodocyclales; Rhodocyclaceae; Thauera                   | 67.8   | 0.83              | 180         | 8,572   | 9.3              | 2.7            | 63.2                     | 0.07                  |
| Bin 049.2 | Bacteria; Proteobacteria; Betaproteobacteria; Rhodocyclales; Rhodocyclaceae; Thauera                   | 67.5   | 2.18              | 213         | 23,756  | 34.2             | 3.5            | 100.0                    | 0.19                  |
| Bin 049.3 | Bacteria; Proteobacteria; Betaproteobacteria; Rhodocyclales; Rhodocyclaceae; Thauera                   | 68.1   | 1.50              | 225         | 14,219  | 40.4             | 3.5            | 100.0                    | 0.14                  |
| Bin 049.4 | Bacteria; Proteobacteria; Betaproteobacteria; Rhodocyclales; Rhodocyclaceae; Thauera                   | 67.5   | 1.09              | 316         | 4,763   | 31.6             | 0.9            | 30.8                     | 0.13                  |
| Bin 050   | Bacteria; Proteobacteria; Alphaproteobacteria; Rhodobacterales; Rhodobacteraceae; Rhodobacter          | 67.1   | 3.68              | 260         | 32,433  | 96.1             | 5.4            | 19.2                     | 0.30                  |
| Bin 051   | Bacteria; Bacteroidetes; Cytophagia                                                                    | 44.3   | 4.46              | 211         | 48,531  | 89.1             | 1.2            | 0.0                      | 0.35                  |
| Bin 052   | Bacteria; Planctomycetes; Phycisphaerae; Phycisphaerales; Phycisphaeraceae; Phycisphaera               | 63.8   | 3.53              | 138         | 136,152 | 95.5             | 1.9            | 0.0                      | 0.27                  |
| Bin 053   | Bacteria; Chloroflexi; Anaerolineae; Anaerolineales; Anaerolineaceae; Anaerolinea                      | 53.8   | 6.46              | 1,214       | 9,633   | 90.2             | 27.5           | 15.2                     | 0.50                  |
| Bin 054   | Bacteria; Verrucomicrobia; Verrucomicrobiae; Verrucomicrobiales; Verrucomicrobiaceae                   | 62.3   | 7.57              | 1,074       | 19,131  | 99.3             | 16.9           | 19.1                     | 0.55                  |
| Bin 055.1 | Bacteria; Bacteroidetes; Sphingobacteriia; Sphingobacteriales; Saprospiraceae                          | 52.6   | 1.50              | 721         | 2,272   | 29.3             | 1.7            | 100.0                    | 0.06                  |
| Bin 055.2 | Bacteria; Bacteroidetes; Sphingobacteriia; Sphingobacteriales; Saprospiraceae                          | 50.2   | 6.61              | 293         | 46,761  | 99.5             | 2.5            | 16.7                     | 0.56                  |
| Bin 056   | Bacteria; Proteobacteria; Gammaproteobacteria                                                          | 59.1   | 2.25              | 419         | 10,463  | 32.8             | 4.9            | 50.0                     | 0.17                  |

Completeness, redundancy and strain heterogeneity were assessed with CHECKM 0.7.1, according to the presence of 43 single-copy reference gene. Bins designated as “bin.XXX.X” were generated using anvi’o (*See Methods*).

**Table S1.** Bins assembled from metagenomic sample from day-522, taxonomic classification based on PhyloSift and metrics from CHECKM (*Cont*).

| Bin Id  | Lowest Assigned Taxonomy Rank                                                                          | GC (%) | Genome size (Mbp) | # Scaffolds | N50    | Completeness (%) | Redundancy (%) | Strain heterogeneity (%) | Mean Coverage 522-day |
|---------|--------------------------------------------------------------------------------------------------------|--------|-------------------|-------------|--------|------------------|----------------|--------------------------|-----------------------|
| Bin 057 | Bacteria; Proteobacteria; Gammaproteobacteria; Chromatiales                                            | 57.9   | 2.43              | 376         | 10,849 | 61.3             | 15.5           | 84.0                     | 0.17                  |
| Bin 058 | Bacteria; Bacteroidetes; Sphingobacteriia; Sphingobacteriales                                          | 40.2   | 3.39              | 132         | 75,779 | 97.8             | 1.0            | 0.0                      | 0.23                  |
| Bin 059 | Bacteria; Proteobacteria; Gammaproteobacteria; Chromatiales                                            | 60.8   | 4.07              | 834         | 9,247  | 60.3             | 30.2           | 43.5                     | 0.27                  |
| Bin 060 | Bacteria                                                                                               | 70.1   | 5.83              | 239         | 51,428 | 97.9             | 6.8            | 9.1                      | 0.38                  |
| Bin 061 | Bacteria; Proteobacteria; Betaproteobacteria; Burkholderiales                                          | 71.0   | 6.75              | 1,221       | 34,227 | 86.7             | 15.4           | 5.6                      | 0.44                  |
| Bin 062 | Bacteria; Actinobacteria; Actinobacteria; Acidimicrobiales; Acidimicrobiaceae                          | 41.3   | 2.11              | 148         | 91,911 | 99.2             | 11.0           | 0.0                      | 0.14                  |
| Bin 063 | Bacteria; Planctomycetes; Planctomycetia; Planctomycetales; Planctomycetaceae; Planctomyces            | 56.4   | 7.39              | 1,206       | 11,128 | 95.5             | 2.3            | 100.0                    | 0.47                  |
| Bin 064 | Bacteria                                                                                               | 47.4   | 2.14              | 842         | 2,929  | 15.2             | 0.8            | 0.0                      | 0.13                  |
| Bin 065 | Bacteria; Verrucomicrobia; Verrucomicrobiae; Verrucomicrobiales; Verrucomicrobiaceae; Verrucomicrobium | 60.8   | 6.31              | 1,166       | 10,868 | 83.5             | 15.6           | 30.6                     | 0.36                  |
| Bin 066 | Unresolved                                                                                             | 59.7   | 6.64              | 1,127       | 21,161 | 100.0            | 43.7           | 2.7                      | 0.38                  |
| Bin 067 | Bacteria; Bacteroidetes; Sphingobacteriia; Sphingobacteriales; Saprospiraceae; Lewinella               | 39.1   | 7.07              | 982         | 16,257 | 100.0            | 55.3           | 0.0                      | 0.40                  |
| Bin 068 | Bacteria; Chloroflexi                                                                                  | 66.0   | 5.63              | 568         | 17,767 | 97.3             | 8.8            | 25.0                     | 0.31                  |
| Bin 069 | Bacteria                                                                                               | 62.3   | 2.13              | 378         | 10,706 | 87.9             | 25.9           | 2.9                      | 0.12                  |
| Bin 070 | Bacteria; Bacteroidetes; Sphingobacteriia; Sphingobacteriales                                          | 37.0   | 4.26              | 771         | 15,497 | 98.7             | 9.3            | 9.5                      | 0.23                  |
| Bin 071 | Bacteria; Proteobacteria; Alphaproteobacteria; Caulobacterales                                         | 66.4   | 3.39              | 972         | 4,531  | 49.8             | 34.8           | 53.9                     | 0.20                  |
| Bin 072 | Bacteria; Bacteroidetes; Sphingobacteriia; Sphingobacteriales                                          | 46.7   | 4.19              | 1,020       | 6,192  | 93.4             | 5.6            | 57.1                     | 0.23                  |
| Bin 073 | Bacteria; Proteobacteria; Alphaproteobacteria                                                          | 41.8   | 3.14              | 983         | 4,183  | 82.3             | 17.1           | 3.2                      | 0.17                  |
| Bin 074 | Bacteria; Bacteroidetes; Sphingobacteriia; Sphingobacteriales; Sphingobacteriaceae; Niabella           | 40.4   | 6.78              | 1,798       | 10,294 | 99.5             | 53.7           | 5.5                      | 0.35                  |
| Bin 075 | Bacteria; Bacteroidetes; Cytophagia; Cytophagales; Flammeovirgaceae; Fulvivirga                        | 42.9   | 3.84              | 788         | 7,441  | 91.4             | 23.8           | 8.9                      | 0.20                  |
| Bin 076 | Bacteria; Actinobacteria; Actinobacteria                                                               | 40.7   | 2.10              | 513         | 7,103  | 96.6             | 31.6           | 1.7                      | 0.09                  |
| Bin 077 | Bacteria                                                                                               | 57.3   | 3.41              | 701         | 10,279 | 91.7             | 15.3           | 5.1                      | 0.16                  |
| Bin 078 | Bacteria; Bacteroidetes; Flavobacteriia; Flavobacteriales; Flavobacteriaceae                           | 35.6   | 6.32              | 1,559       | 7,104  | 92.2             | 46.5           | 4.0                      | 0.29                  |
| Bin 079 | Bacteria; Proteobacteria; Alphaproteobacteria; Caulobacterales; Caulobacteraceae; Brevundimonas        | 65.6   | 4.06              | 1,406       | 3,852  | 71.6             | 55.7           | 26.4                     | 0.18                  |
| Bin 080 | Bacteria; Proteobacteria; Alphaproteobacteria; Rhizobiales                                             | 69.0   | 3.89              | 1,574       | 2,847  | 46.0             | 28.1           | 25.0                     | 0.18                  |
| Bin 081 | Bacteria; Proteobacteria; Alphaproteobacteria; Caulobacterales; Caulobacteraceae; Brevundimonas        | 69.0   | 6.20              | 2,724       | 2,552  | 77.7             | 65.5           | 16.7                     | 0.30                  |
| Bin 082 | Bacteria; Proteobacteria; Alphaproteobacteria; Rhizobiales; Phyllobacteriaceae                         | 67.5   | 4.21              | 1,806       | 2,664  | 63.6             | 32.9           | 18.2                     | 0.19                  |
| Bin 083 | Bacteria; Proteobacteria; Alphaproteobacteria; Rhizobiales; Phyllobacteriaceae                         | 65.3   | 1.33              | 566         | 2,758  | 32.7             | 5.5            | 37.5                     | 0.06                  |
| Bin 084 | Bacteria; Proteobacteria; Alphaproteobacteria; Rhizobiales; Phyllobacteriaceae                         | 64.0   | 1.19              | 415         | 4,346  | 19.1             | 2.6            | 12.8                     | 0.05                  |
| Bin 085 | Bacteria; Proteobacteria; Alphaproteobacteria; Rhizobiales; Hyphomicrobiaceae; Hyphomicrobium          | 66.0   | 4.85              | 1,315       | 5,676  | 49.7             | 24.1           | 0.0                      | 0.21                  |
| Bin 086 | Bacteria; Bacteroidetes                                                                                | 48.0   | 1.27              | 633         | 2,002  | 13.3             | 1.0            | 0.0                      | 0.06                  |
| Bin 087 | Bacteria; Chloroflexi; Caldilineae; Caldilineales; Caldilineaceae; Caldilinea                          | 59.3   | 6.80              | 1,633       | 5,903  | 84.0             | 6.6            | 12.5                     | 0.29                  |

Completeness, redundancy and strain heterogeneity were assessed with CHECKM 0.7.1, according to the presence of 43 single-copy reference gene

Bins designated as “bin.XXX.X” were generated using anvi'o (*See Methods*).

**Table S1.** Bins assembled from metagenomic sample from day-522, taxonomic classification based on PhyloSift and metrics from CHECKM (*Cont*).

| Bin Id    | Lowest Assigned Taxonomy Rank                                                                          | GC (%) | Genome size (Mbp) | # Scaffolds | N50   | Completeness (%) | Redundancy (%) | Strain heterogeneity (%) | Mean Coverage 522-day |
|-----------|--------------------------------------------------------------------------------------------------------|--------|-------------------|-------------|-------|------------------|----------------|--------------------------|-----------------------|
| Bin 088   | Bacteria; Bacteroidetes                                                                                | 44.1   | 1.43              | 561         | 3,129 | 6.0              | 0.0            | 0.0                      | 0.06                  |
| Bin 089   | Bacteria; Proteobacteria; Deltaproteobacteria; Bdellovibrionales; Bdellovibrionaceae; Bdellovibrio     | 53.8   | 4.56              | 1,371       | 6,984 | 94.7             | 64.0           | 2.9                      | 0.19                  |
| Bin 090   | Bacteria; Bacteroidetes                                                                                | 43.8   | 2.82              | 819         | 4,720 | 85.8             | 9.9            | 3.6                      | 0.11                  |
| Bin 091   | Bacteria; Proteobacteria; Betaproteobacteria; Burkholderiales                                          | 67.0   | 8.09              | 3,579       | 2,391 | 65.5             | 59.5           | 3.4                      | 0.32                  |
| Bin 092   | Bacteria; Proteobacteria; Alphaproteobacteria; Rhizobiales                                             | 65.8   | 0.64              | 333         | 1,995 | 21.0             | 12.3           | 0.0                      | 0.03                  |
| Bin 093   | Bacteria; Proteobacteria; Alphaproteobacteria; Rhizobiales                                             | 65.5   | 0.51              | 290         | 1,714 | 23.3             | 23.5           | 9.4                      | 0.02                  |
| Bin 094   | Bacteria; Proteobacteria; Betaproteobacteria; Burkholderiales                                          | 72.2   | 6.56              | 2,711       | 2,926 | 62.1             | 18.1           | 26.7                     | 0.26                  |
| Bin 095   | Bacteria; Proteobacteria; Deltaproteobacteria; Bdellovibrionales; Bdellovibrionaceae; Bdellovibrio     | 38.3   | 2.98              | 1,141       | 2,768 | 80.5             | 37.8           | 1.9                      | 0.11                  |
| Bin 096   | Bacteria                                                                                               | 57.7   | 3.88              | 1,960       | 1,962 | 49.0             | 39.4           | 2.8                      | 0.15                  |
| Bin 097.1 | Bacteria; Proteobacteria; Betaproteobacteria                                                           | 62.9   | 1.23              | 651         | 1,962 | 27.1             | 1.7            | 14.3                     | 0.05                  |
| Bin 097.2 | Bacteria; Proteobacteria; Gammaproteobacteria                                                          | 63.4   | 3.13              | 1,645       | 1,941 | 24.3             | 3.4            | 0.0                      | 0.11                  |
| Bin 097.3 | Bacteria; Proteobacteria; Gammaproteobacteria                                                          | 63.2   | 2.54              | 1,101       | 2,687 | 51.5             | 9.6            | 0.0                      | 0.09                  |
| Bin 097.4 | Bacteria; Proteobacteria; Betaproteobacteria; Rhodocyclales; Rhodocyclaceae; Accumulibacter phosphatis | 63.5   | 0.93              | 274         | 4,779 | 27.0             | 4.3            | 33.3                     | 0.04                  |
| Bin 098   | Bacteria; Planctomycetes; Phycisphaerae; Phycisphaerales; Phycisphaeraceae; Phycisphaera               | 69.6   | 6.72              | 2,642       | 3,009 | 88.7             | 56.8           | 1.2                      | 0.25                  |
| Bin 099   | Bacteria; Proteobacteria; Alphaproteobacteria; Rhodospirillales                                        | 70.3   | 4.89              | 2,736       | 1,821 | 62.2             | 51.7           | 6.3                      | 0.18                  |
| Bin 100   | Bacteria                                                                                               | 45.7   | 1.02              | 466         | 2,321 | 52.7             | 15.3           | 2.7                      | 0.04                  |
| Bin 101   | Bacteria; Proteobacteria; Alphaproteobacteria; Rhodobacterales; Rhodobacteraceae; Rhodobacter          | 65.0   | 3.12              | 1,836       | 1,690 | 43.8             | 15.7           | 26.7                     | 0.12                  |
| Bin 102   | Bacteria; Proteobacteria; Alphaproteobacteria; Rhodobacterales; Rhodobacteraceae; Rhodobacter          | 69.2   | 5.11              | 2,623       | 2,055 | 61.2             | 64.7           | 9.5                      | 0.18                  |
| Bin 103   | Bacteria; Proteobacteria; Deltaproteobacteria; Myxococcales; Polyangiaceae; Sorangium                  | 70.5   | 7.09              | 2,712       | 3,101 | 82.2             | 7.1            | 15.4                     | 0.25                  |
| Bin 104   | Bacteria                                                                                               | 57.0   | 7.55              | 3,857       | 2,060 | 62.3             | 22.4           | 2.0                      | 0.25                  |
| Bin 105   | Bacteria; Proteobacteria; Alphaproteobacteria; Rhizobiales                                             | 71.6   | 2.94              | 1,919       | 1,471 | 42.2             | 16.4           | 12.5                     | 0.10                  |
| Bin 106   | Bacteria; Proteobacteria; Alphaproteobacteria; Rhodobacterales; Hyphomonadaceae                        | 64.4   | 3.41              | 1,360       | 3,040 | 82.2             | 13.7           | 7.6                      | 0.12                  |
| Bin 107   | Bacteria; Proteobacteria; Alphaproteobacteria; Rhizobiales                                             | 63.0   | 3.91              | 1,954       | 2,128 | 67.2             | 35.0           | 4.7                      | 0.14                  |
| Bin 108   | Bacteria; Proteobacteria; Alphaproteobacteria; Rhodobacterales; Rhodobacteraceae                       | 66.2   | 3.43              | 1,770       | 1,972 | 59.1             | 32.4           | 24.9                     | 0.12                  |
| Bin 109   | Bacteria; Proteobacteria; Alphaproteobacteria; Rhizobiales                                             | 64.7   | 3.68              | 1,845       | 2,106 | 65.5             | 23.3           | 0.0                      | 0.13                  |
| Bin 110   | Bacteria; Proteobacteria; Alphaproteobacteria; Rickettsiales                                           | 40.6   | 1.48              | 567         | 3,037 | 88.2             | 3.7            | 50.0                     | 0.05                  |
| Bin 111   | Bacteria; Bacteroidetes; Bacteroidia; Bacteroidales                                                    | 43.6   | 2.47              | 1,462       | 1,718 | 60.9             | 5.0            | 15.4                     | 0.08                  |
| Bin 112   | Bacteria; Bacteroidetes; Sphingobacteriia; Sphingobacteriales                                          | 43.2   | 2.51              | 1,144       | 2,465 | 68.4             | 4.9            | 26.7                     | 0.08                  |
| Bin 113   | Bacteria                                                                                               | 51.5   | 8.28              | 4,346       | 1,986 | 80.8             | 38.7           | 1.6                      | 0.26                  |
| Bin 114   | Bacteria; Proteobacteria; Alphaproteobacteria                                                          | 62.2   | 3.72              | 2,141       | 1,661 | 38.7             | 25.2           | 1.9                      | 0.12                  |
| Bin 115   | Bacteria; Proteobacteria; Alphaproteobacteria; Rhizobiales                                             | 58.5   | 2.35              | 1,228       | 1,997 | 54.5             | 5.9            | 7.3                      | 0.07                  |

Completeness, redundancy and strain heterogeneity were assessed with CHECKM 0.7.1, according to the presence of 43 single-copy reference gene

Bins designated as “bin.XXX.X” were generated using anvi’o (*See Methods*).

**Table S1.** Bins assembled from metagenomic sample from day-522, taxonomic classification based on PhyloSift and metrics from CHECKM (*Cont*).

| Bin Id    | Lowest Assigned Taxonomy Rank                                                               | GC (%) | Genome size (Mbp) | # Scaffolds | N50   | Completeness (%) | Redundancy (%) | Strain heterogeneity (%) | Mean Coverage 522-day |
|-----------|---------------------------------------------------------------------------------------------|--------|-------------------|-------------|-------|------------------|----------------|--------------------------|-----------------------|
| Bin 116   | Bacteria; Bacteroidetes                                                                     | 66.8   | 2.51              | 1,220       | 2,273 | 65.0             | 8.5            | 4.0                      | 0.08                  |
| Bin 117   | Bacteria; Bacteroidetes; Sphingobacteriia; Sphingobacteriales                               | 30.6   | 2.17              | 1,293       | 1,580 | 53.1             | 4.7            | 0.0                      | 0.07                  |
| Bin 118   | Bacteria; Planctomycetes; Planctomycetia; Planctomycetales; Planctomycetaceae; Planctomyces | 58.2   | 4.64              | 2,302       | 2,163 | 69.8             | 3.1            | 14.3                     | 0.15                  |
| Bin 119.1 | Bacteria                                                                                    | 66.5   | 0.67              | 350         | 1,901 | 6.6              | 1.0            | 0.0                      | 0.02                  |
| Bin 119.2 | Bacteria; Planctomycetes; Phycisphaerae; Phycisphaerales; Phycisphaeraceae; Phycisphaera    | 66.4   | 1.57              | 797         | 1,955 | 21.9             | 3.0            | 10.0                     | 0.05                  |
| Bin 119.3 | Bacteria                                                                                    | 66.5   | 1.66              | 972         | 1,716 | 24.7             | 0.1            | 0.0                      | 0.05                  |
| Bin 119.4 | Bacteria; Proteobacteria                                                                    | 66.9   | 0.99              | 663         | 1,451 | 10.2             | 0.9            | 0.0                      | 0.02                  |
| Bin 120   | Bacteria; Chloroflexi; Caldilineae; Caldilineales; Caldilineaceae; Caldilinea               | 60.8   | 4.35              | 2,538       | 1,728 | 59.3             | 16.4           | 0.0                      | 0.13                  |
| Bin 121   | Bacteria                                                                                    | 69.7   | 4.85              | 2,799       | 1,765 | 57.7             | 17.4           | 0.0                      | 0.15                  |
| Bin 122   | Bacteria; Proteobacteria; Gammaproteobacteria; Chromatiales; Chromatiaceae                  | 66.7   | 3.36              | 2,112       | 1,600 | 54.4             | 18.6           | 33.3                     | 0.10                  |
| Bin 123   | Bacteria; Acidobacteria                                                                     | 51.6   | 2.14              | 1,195       | 1,867 | 46.3             | 2.8            | 22.2                     | 0.06                  |
| Bin 124   | Bacteria                                                                                    | 63.3   | 3.46              | 2,223       | 1,533 | 49.3             | 15.8           | 0.0                      | 0.10                  |

Completeness, redundancy and strain heterogeneity were assessed with CHECKM 0.7.1, according to the presence of 43 single-copy reference gene

Bins designated as “bin.XXX.X” were generated using anvi’o (*See Materials and Methods*)



**Table S2.** Metrics of *Accumulibacter* UW-LDO-01 after each genome refinement step.

| <b>Refinement step</b>     | <b>GC (%)</b> | <b>Genome size (Mbp)</b> | <b>Gene count</b> | <b># Scaffolds</b> | <b>N50</b> | <b>Completeness (%)</b> | <b>Redundancy (%)</b> | <b>Strain heterogeneity (%)</b> |
|----------------------------|---------------|--------------------------|-------------------|--------------------|------------|-------------------------|-----------------------|---------------------------------|
| MaxBin (bin.046)           | 62.60         | 6.60                     | 6,291             | 666                | 23,909     | 94.8                    | 28.94                 | 20.29                           |
| Anvio decontamination      | 62.49         | 4.55                     | 4,097             | 239                | 36,358     | 94.8                    | 0.84                  | 100.00                          |
| Nanopore Links scaffolding | 62.49         | 4.61                     | 4,074             | 120                | 85,302     | 94.8                    | 0.68                  | 100.00                          |
| Gapcloser                  | 62.48         | 4.70                     | 4,166             | 120                | 85,321     | 95.2                    | 0.68                  | 100.00                          |

Completeness, redundancy and strain heterogeneity were assessed with CHECKM 0.7.1, according to the presence of 43 single-copy reference genes.

**Table S3.** RNA-seq summary. Number of reads after each step of RNA reads filtering and normalization factors used for RPKM calculations, as described in Methods.

| <b>Sample</b>                                           | <b>TimeA<br/>Anaerobic-<br/>10min</b> | <b>TimeB<br/>Anaerobic-<br/>32min</b> | <b>TimeC<br/>Aerobic-<br/>0min</b> | <b>TimeD<br/>Aerobic-<br/>22min</b> | <b>TimeE<br/>Aerobic-<br/>52min</b> | <b>TimeF<br/>Aerobic-<br/>292min</b> |
|---------------------------------------------------------|---------------------------------------|---------------------------------------|------------------------------------|-------------------------------------|-------------------------------------|--------------------------------------|
| <b>Total Reads</b>                                      | 317,752,258                           | 289,487,298                           | 279,849,682                        | 272,986,806                         | 271,430,590                         | 286,971,580                          |
| <b>Normalization<br/>Factor from<br/>Total Reads</b>    | 1.17                                  | 1.07                                  | 1.03                               | 1.01                                | 1.00                                | 1.06                                 |
| <b>Quality Reads</b>                                    | 312,696,898                           | 285,415,418                           | 275,951,004                        | 270,309,846                         | 268,730,228                         | 283,344,794                          |
| <b>Merged Reads</b>                                     | 98,190,636                            | 88,219,624                            | 83,934,087                         | 83,755,245                          | 84,265,579                          | 83,962,296                           |
| <b>rRNA<br/>Sequences</b>                               | 27,374,143                            | 21,015,585                            | 22,055,875                         | 17,613,784                          | 15,900,468                          | 21,372,211                           |
| <b>non rRNA<br/>Sequences</b>                           | 70,816,493                            | 67,204,039                            | 61,878,212                         | 66,141,461                          | 68,365,111                          | 62,590,085                           |
| <b>Normalization<br/>Factor from<br/>Filtered Reads</b> | 1.14                                  | 1.09                                  | 1.00                               | 1.07                                | 1.10                                | 1.01                                 |

**Table S4.** Summary of primers used for RT-qPCR.

| Target Gene                                | Gene Symbol   | Gene Length (bp) | Primer Target Site         | Primer Sequence (5'-3')                          | Amplicon Length (bp) |
|--------------------------------------------|---------------|------------------|----------------------------|--------------------------------------------------|----------------------|
| Nitrite reductase                          | <i>nirS-1</i> | 1,739            | 147-164<br>291-311         | GTCGGCGATCGCGCAAT<br>AGCGTTTTGTCCGTAGTCAGA       | 164                  |
| Respiratory nitrate reductase alpha chain  | <i>narG</i>   | 3,819            | 336-353<br>403-424         | CCGATGGTTCGCGGTCA<br>CGGACTCGACGATCGATGTCC       | 91                   |
| Nitric oxide reductase, qNOR-like          | <i>norZ</i>   | 2,282            | 1,846-1,864<br>2,204-2,221 | CTTTGGGCTGGGTGGGT<br>CGCGATCGGCGCTCAAAC          | 375                  |
| Nitrous-oxide reductase                    | <i>nosZ</i>   | 2,297            | 591-616<br>935-954         | AAGAAATTCGAGCCACTAGAGGAAT<br>AACATCCAGCGGCAATACG | 363                  |
| Cytochrome c oxidase, cbb3-type, subunit I | <i>ccoN</i>   | 1,428            | 241-260<br>344-365         | CCTGCCATACGCGACTTTT<br>TCGGCATACTCTTTGGACTGG     | 124                  |
| Cytochrome c oxidase polypeptide I         | <i>ctaD</i>   | 1,611            | 816-834<br>932-951         | TCGCATGTCATCCCTGCC<br>GGTCAGCGGAATACCGGTC        | 135                  |
| RNA polymerase sigma-54 factor             | <i>rpoN</i>   | 1,440            | 153-170<br>594-611         | GAGTACGCGCGGACGGA<br>TGTGCGCTGCGAGCCCC           | 487                  |

**Table S5.** Estimated abundance, at the genus level, of the most abundant taxonomic units in sample used for RNA-seq (522-day). Values were determined using 16S rRNA amplicon sequencing, as described in Methods.

| <b>Genus</b>                   | <b>% Relative Abundance</b> |
|--------------------------------|-----------------------------|
| Candidatus Accumulibacter      | 34.0                        |
| Competibacteraceae CPB_C22&F32 | 15.9                        |
| Lewinella                      | 10.6                        |
| unclassified Cytophagaceae     | 6.2                         |
| unclassified Hyphomonadaceae   | 4.4                         |
| Thauera                        | 3.4                         |
| unclassified Lentisphaerae     | 2.4                         |
| Prostheco bacter               | 2.2                         |
| Saprospiraceae QEDR3BF09       | 1.7                         |
| Dechloromonas                  | 1.3                         |
| Flavobacteriales PHOS-HE28     | 1.2                         |
| Rickettsiales SM2D12           | 1.0                         |
| unclassified Saprospiraceae    | 0.9                         |
| unclassified Chitinophagaceae  | 0.8                         |
| unclassified Rhodobacteraceae  | 0.7                         |
| Ignavibacterium                | 0.7                         |
| unclassified Flavobacteriaceae | 0.6                         |
| Chlorobiales OPB56             | 0.6                         |
| Brevundimonas                  | 0.6                         |
| Other                          | 10.8                        |

**Table S6.** Estimated abundance of each clade relative to the total *Accumulibacter* lineage in sample analyzed with RNA-seq. Values were determined using qPCR targeting the *ppk1* gene, as described in Methods.

| <b>Clade</b> | <b>% Relative Abundance</b> |
|--------------|-----------------------------|
| IA           | 0.0                         |
| IB           | 0.0                         |
| IC           | 74.4                        |
| ID           | 0.0                         |
| IE           | 0.1                         |
| IIA          | 9.2                         |
| IIB          | 0.1                         |
| IIC          | 0.0                         |
| IID          | 13.6                        |
| IIE          | 0.0                         |
| IIF          | 2.5                         |
| IIG          | 0.1                         |

**Table S7.** Locus tag of genes associated with denitrification and aerobic respiration in genomes of *Accumulibacter* with published annotations.

| Category                      | Gene                  | 66-26                      | UW-1                               | SK-01                          | SK-02                    | BA-91                                  | BA-94      | SK-11      | SK-12      | BA-93                    | UW-2                               | BA-92                                  | UW-LDO-IC                                 |
|-------------------------------|-----------------------|----------------------------|------------------------------------|--------------------------------|--------------------------|----------------------------------------|------------|------------|------------|--------------------------|------------------------------------|----------------------------------------|-------------------------------------------|
| Nitrite/nitrate transport     | <i>narK</i>           |                            | CAP2UW1_RS13840                    | CAPSK01_00973<br>CAPSK01_00972 | AW06_03543<br>AW06_03542 | AW09_04395<br>AW09_01219<br>AW09_01220 |            |            | AW08_01696 | AW11_00623               | Ga0078784_16490                    | AW10_02293<br>AW10_04278<br>AW10_04277 | DVS81_13630<br>DVS81_13635                |
| Respiratory Nitrate Reduction | <i>narI</i>           |                            |                                    | CAPSK01_00968                  | AW06_03547               | AW09_04883<br>AW09_04436               |            |            |            |                          |                                    |                                        | DVS81_13655                               |
|                               | <i>narJ</i>           |                            |                                    | CAPSK01_00969                  | AW06_03546               | AW09_04435                             |            |            |            |                          |                                    |                                        | DVS81_13650                               |
|                               | <i>narH</i>           |                            |                                    | CAPSK01_00970                  | AW06_03545               | AW09_03334<br>AW09_04435               |            |            |            |                          |                                    |                                        | DVS81_13645                               |
|                               | <i>narG</i>           |                            |                                    | CAPSK01_00971                  | AW06_03544               | AW09_00845                             |            |            |            |                          |                                    |                                        | DVS81_13640                               |
| Periplasmic Nitrate Reduction | <i>napD</i>           | BGO63_05850                | CAP2UW1_RS19375                    |                                |                          |                                        | AW12_02777 |            |            | AW11_02156               | Ga0078784_16675                    | AW10_00993                             |                                           |
|                               | <i>napA</i>           | BGO63_05855                | CAP2UW1_RS19380                    |                                |                          |                                        | AW12_02778 |            |            | AW11_02155               | Ga0078784_16676                    | AW10_00992                             |                                           |
|                               | <i>napG</i>           | BGO63_05860                | CAP2UW1_RS19385                    |                                |                          |                                        |            | AW07_00314 | AW08_03811 | AW11_02154               | Ga0078784_16677                    | AW10_00991                             |                                           |
|                               | <i>napH</i>           | BGO63_05865                | CAP2UW1_RS19390                    |                                |                          |                                        |            | AW07_00315 | AW08_03810 | AW11_02153               | Ga0078784_16678                    | AW10_00990                             |                                           |
|                               | <i>napB</i>           | BGO63_05870                | CAP2UW1_RS19395                    |                                |                          |                                        |            |            | AW08_03809 | AW11_02152               | Ga0078784_16679                    | AW10_00989                             |                                           |
| Nitrite Reduction             | <i>nirS</i>           | BGO63_10625<br>BGO63_07995 | CAP2UW1_RS12415                    | CAPSK01_00966                  | AW06_03549               | AW09_04881                             |            | AW07_01971 | AW08_01974 | AW11_03206<br>AW11_01110 | Ga0078784_11456<br>Ga0078784_16169 | AW10_00297<br>AW10_01909               | DVS81_20760<br>DVS81_12285<br>DVS81_17305 |
|                               | <i>nirM</i>           | BGO63_10620                | CAP2UW1_RS12410                    | CAPSK01_03625                  | AW06_03550               | AW09_04517                             | AW12_00607 | AW07_01106 | AW08_01973 | AW11_00400               | Ga0078784_11457                    | AW10_00298                             | DVS81_05230                               |
|                               | <i>nirN</i>           | BGO63_15090                | CAP2UW1_RS01495                    | CAPSK01_04667                  | AW06_00888<br>AW06_01533 | AW09_05015<br>AW09_02026               | AW12_01837 | AW07_03428 | AW08_02733 | AW11_00134               | Ga0078784_161768                   | AW10_02670                             | DVS81_05225                               |
|                               | <i>nirJ</i>           | BGO63_15095                | CAP2UW1_RS01500                    | CAPSK01_04668                  | AW06_01532<br>AW06_00887 | AW09_02027                             | AW12_01838 | AW07_03429 | AW08_02732 | AW11_00135               | Ga0078784_161769                   | AW10_02671                             | DVS81_12305                               |
|                               | <i>nirC</i>           | BGO63_10615                | CAP2UW1_RS12405                    | CAPSK01_02537                  | AW06_03944               | AW09_01616                             |            | AW07_01957 | AW08_01959 | AW11_03210               | Ga0078784_11460                    | AW10_00301                             | DVS81_16850                               |
|                               | <i>nirF</i>           | BGO63_15190                | CAP2UW1_RS16895                    | CAPSK01_00714                  | AW06_03796               | AW09_02150                             | AW12_03398 | AW07_03938 | AW08_02575 | AW11_03018               | Ga0078784_11285                    | AW10_00481                             | DVS81_16855                               |
|                               | <i>nirD/<br/>nirL</i> | BGO63_15185                | CAP2UW1_RS16890                    | CAPSK01_00715                  | AW06_03795               | AW09_01742<br>AW09_02149               |            | AW07_03937 | AW08_02576 | AW11_03019               | Ga0078784_11286                    | AW10_00481                             | DVS81_16860                               |
|                               | <i>nirG</i>           | BGO63_15180                | CAP2UW1_RS16885                    | CAPSK01_00716                  | AW06_03794               | AW09_01741                             |            | AW07_03936 | AW08_02577 | AW11_03020               | Ga0078784_11287                    | AW10_00480                             | DVS81_16865                               |
| <i>nirH</i>                   | BGO63_15175           | CAP2UW1_RS16880            | CAPSK01_00717                      | AW06_03793                     | AW09_01740               |                                        | AW07_03935 | AW08_02578 | AW11_03021 | Ga0078784_11288          | AW10_00479                         | DVS81_20925                            |                                           |
| Nitric Oxide Reduction        | <i>norZ</i>           | BGO63_01415<br>BGO63_01420 | CAP2UW1_RS11595                    |                                |                          |                                        |            |            |            | AW11_01319               |                                    | AW10_01907                             | DVS81_16815                               |
| Nitrous Oxide Reduction       | <i>nosD</i>           | BGO63_05040<br>BGO63_15225 | CAP2UW1_RS16930<br>CAP2UW1_RS19520 |                                |                          |                                        | AW12_03390 | AW07_04345 | AW08_03173 | AW11_03011               | Ga0078784_11278                    | AW10_01530<br>AW10_00489               | DVS81_16795                               |
|                               | <i>nosZ</i>           | BGO63_01150                | CAP2UW1_RS16950                    |                                |                          |                                        |            | AW07_04349 | AW08_03048 | AW11_03007               | Ga0078784_11274                    | AW10_00493                             | DVS81_16830                               |
|                               | <i>nosF</i>           | BGO63_15210                | CAP2UW1_RS16915                    |                                |                          |                                        |            | AW07_03942 | AW08_02570 | AW11_03014               | Ga0078784_11281                    | AW10_00484                             | DVS81_16835                               |
|                               | <i>nosL</i>           | BGO63_15205                | CAP2UW1_RS16910                    |                                |                          |                                        |            | AW07_03941 | AW08_01972 | AW11_03015               | Ga0078784_11282                    | AW10_00485                             | DVS81_16840                               |
|                               | <i>nosY</i>           | BGO63_15200                | CAP2UW1_RS16905                    |                                |                          |                                        |            | AW07_03940 | AW08_02572 | AW11_03016               | Ga0078784_11283                    | AW10_00484                             | DVS81_13630<br>DVS81_13635                |

**Table S8.** Locus tag of genes associated with denitrification and aerobic respiration in genomes of *Accumulibacter* with published annotations.

| Category                                          | Gene        | 66-26                      | UW-1            | SK-01         | SK-02      | BA-91                    | BA-94      | SK-11      | SK-12      | BA-93      | UW-IA            | BA-92                    | UW-LDO-IC   |
|---------------------------------------------------|-------------|----------------------------|-----------------|---------------|------------|--------------------------|------------|------------|------------|------------|------------------|--------------------------|-------------|
| Cytochrome c oxidation ( <i>cbb<sub>3</sub></i> ) | <i>ccoN</i> | BGO63_02185                | CAP2UW1_RS12650 | CAPSK01_02001 | AW06_01080 |                          | AW12_03440 | AW07_02023 | AW08_01074 | AW11_01636 | Ga0078784_16238  |                          | DVS81_08570 |
|                                                   | <i>ccoO</i> | BGO63_02190                | CAP2UW1_RS12645 | CAPSK01_02000 | AW06_01081 | AW09_00171               | AW12_03441 | AW07_02022 | AW08_01075 | AW11_01637 | Ga0078784_16237  |                          | DVS81_08565 |
|                                                   | <i>ccoQ</i> | BGO63_02195                | CAP2UW1_RS12640 | CAPSK01_01999 | AW06_01082 |                          | AW12_03442 | AW07_01648 | AW08_01076 | AW11_01638 | Ga0078784_16236  |                          | DVS81_08560 |
|                                                   | <i>ccoP</i> | BGO63_02200                | CAP2UW1_RS12635 | CAPSK01_01998 | AW06_01083 | AW09_00172               | AW12_03443 | AW07_02020 | AW08_01077 | AW11_01639 | Ga0078784_16235  |                          | DVS81_08555 |
|                                                   | <i>ccoG</i> | BGO63_02205                | CAP2UW1_RS12630 | CAPSK01_01997 | AW06_01084 | AW09_00173               | AW12_03444 | AW07_02019 | AW08_01078 | AW11_01641 | Ga0078784_16233  |                          | DVS81_08545 |
|                                                   | <i>ccoH</i> | BGO63_02210                | CAP2UW1_RS12625 | CAPSK01_01996 | AW06_01085 | AW09_00174               | AW12_03445 | AW07_02018 | AW08_01079 | AW11_01642 | Ga0078784_16232  |                          | DVS81_08540 |
|                                                   | <i>ccoI</i> | BGO63_02175                | CAP2UW1_RS12660 | CAPSK01_02004 | AW06_01078 | AW09_00469               | AW12_01853 | AW07_02026 | AW08_01072 | AW11_01634 | Ga0078784_16240  |                          | DVS81_07980 |
|                                                   | <i>ccoS</i> | BGO63_02180                | CAP2UW1_RS12655 | CAPSK01_02002 | AW06_01079 |                          | AW12_03439 |            | AW08_01073 | AW11_01635 | Ga0078784_16239  |                          | DVS81_07975 |
| Cytochrome c oxidation ( <i>ba<sub>3</sub></i> )  | <i>cbaA</i> |                            | CAP2UW1_RS08915 | CAPSK01_02286 | AW06_04048 |                          | AW12_01750 | AW07_03205 | AW08_03217 | AW11_01056 | Ga0078784_1135   | AW10_02150               | DVS81_11870 |
|                                                   | <i>cbaB</i> |                            | CAP2UW1_RS08920 | CAPSK01_02287 | AW06_04049 | AW09_03865               | AW12_01749 | AW07_03206 | AW08_03218 | AW11_01057 | Ga0078784_1136   | AW10_02151               | DVS81_11875 |
| Cytochrome c oxidation ( <i>aa<sub>3</sub></i> )  | <i>ctaD</i> | BGO63_08500<br>BGO63_08555 | CAP2UW1_RS20650 | CAPSK01_02318 | AW06_01187 | AW09_03272               |            |            |            | AW11_00093 | Ga0078784_161727 | AW10_02621               | DVS81_11220 |
|                                                   | <i>ctaC</i> | BGO63_08495<br>BGO63_08550 | CAP2UW1_RS20655 | CAPSK01_02319 | AW06_01186 | AW09_03273<br>AW09_03276 |            | AW07_03129 | AW08_03918 | AW11_00092 | Ga0078784_161724 | AW10_02617<br>AW10_02620 | DVS81_11215 |
|                                                   | <i>ctaE</i> | BGO63_08505<br>BGO63_08565 | CAP2UW1_RS20640 | CAPSK01_02314 | AW06_01191 | AW09_03269               | AW12_00507 | AW07_01646 | AW08_03349 | AW11_00097 | Ga0078784_161731 | AW10_02625               | DVS81_11235 |

**Table S9.** Number and percentage of unambiguous RNA filtered reads, mapping to the metagenomic assembly and Accumulibacter genomes.

| Sample                         | TimeA Anaerobic-10min |                | TimeB Anaerobic-32min |                | TimeC Aerobic-0min |                | TimeD Aerobic-22min |                | TimeE Aerobic-52min |                | TimeF Aerobic-292min |                |
|--------------------------------|-----------------------|----------------|-----------------------|----------------|--------------------|----------------|---------------------|----------------|---------------------|----------------|----------------------|----------------|
|                                | Mapping Reads         | Percentage (%) | Mapping Reads         | Percentage (%) | Mapping Reads      | Percentage (%) | Mapping Reads       | Percentage (%) | Mapping Reads       | Percentage (%) | Mapping Reads        | Percentage (%) |
| <b>Metagenomic Assembly</b>    | 53,436,191            | 75.46          | 52,119,320            | 77.55          | 47,295,895         | 76.43          | 50,558,369          | 76.44          | 53,488,638          | 78.24          | 48,598,042           | 77.64          |
| <b>Accumulibacter Genomes</b>  |                       |                |                       |                |                    |                |                     |                |                     |                |                      |                |
| Accumulibacter sp. UW-LDO-IC   | 34,153,509            | 48.23          | 33,074,188            | 49.21          | 29,322,430         | 47.39          | 30,879,766          | 46.69          | 34,022,590          | 49.77          | 31,266,884           | 49.96          |
| Accumulibacter BA-94           | 339,200               | 0.48           | 301,935               | 0.45           | 255,777            | 0.41           | 346,896             | 0.52           | 317,890             | 0.46           | 224,432              | 0.36           |
| Accumulibacter sp. 66-26       | 269,960               | 0.38           | 293,672               | 0.44           | 245,888            | 0.40           | 333,846             | 0.50           | 237,221             | 0.35           | 178,552              | 0.29           |
| Accumulibacter HKU-1           | 188,368               | 0.27           | 193,623               | 0.29           | 182,887            | 0.30           | 204,697             | 0.31           | 212,465             | 0.31           | 162,371              | 0.26           |
| Accumulibacter sp. SK-01       | 173,780               | 0.25           | 151,800               | 0.23           | 170,589            | 0.28           | 186,542             | 0.28           | 170,390             | 0.25           | 107,689              | 0.17           |
| Accumulibacter UW-1            | 72,429                | 0.10           | 89,236                | 0.13           | 72,698             | 0.12           | 89,727              | 0.14           | 87,761              | 0.13           | 53,462               | 0.09           |
| Accumulibacter UW-2            | 70,297                | 0.10           | 78,092                | 0.12           | 62,826             | 0.10           | 85,618              | 0.13           | 85,442              | 0.12           | 49,247               | 0.08           |
| Accumulibacter sp. BA-91       | 60,110                | 0.08           | 58,687                | 0.09           | 46,351             | 0.07           | 58,856              | 0.09           | 56,933              | 0.08           | 48,747               | 0.08           |
| Accumulibacter isolate UBA2783 | 50,148                | 0.07           | 49,101                | 0.07           | 41,300             | 0.07           | 50,813              | 0.08           | 56,204              | 0.08           | 44,659               | 0.07           |
| Accumulibacter isolate UBA2327 | 49,524                | 0.07           | 44,260                | 0.07           | 37,601             | 0.06           | 48,117              | 0.07           | 49,554              | 0.07           | 41,685               | 0.07           |
| Accumulibacter sp. BA-93       | 38,591                | 0.05           | 35,627                | 0.05           | 31,382             | 0.05           | 40,003              | 0.06           | 35,517              | 0.05           | 34,713               | 0.06           |
| Accumulibacter SK-11           | 38,389                | 0.05           | 30,882                | 0.05           | 30,956             | 0.05           | 35,010              | 0.05           | 34,180              | 0.05           | 34,667               | 0.06           |
| Accumulibacter BA-92           | 32,312                | 0.05           | 28,511                | 0.04           | 26,003             | 0.04           | 28,094              | 0.04           | 27,473              | 0.04           | 28,558               | 0.05           |
| Accumulibacter sp. UBA704      | 16,636                | 0.02           | 17,642                | 0.03           | 15,813             | 0.03           | 19,947              | 0.03           | 13,896              | 0.02           | 12,744               | 0.02           |
| Accumulibacter sp. SK-02       | 13,269                | 0.02           | 15,392                | 0.02           | 10,148             | 0.02           | 14,459              | 0.02           | 13,844              | 0.02           | 9,920                | 0.02           |
| Accumulibacter isolate UBA6585 | 9,822                 | 0.01           | 10,203                | 0.02           | 7,879              | 0.01           | 11,236              | 0.02           | 11,501              | 0.02           | 9,355                | 0.01           |
| Accumulibacter isolate HKU-2   | 9,465                 | 0.01           | 8,464                 | 0.01           | 6,692              | 0.01           | 8,719               | 0.01           | 8,758               | 0.01           | 8,205                | 0.01           |
| Accumulibacter isolate UBA6658 | 7,560                 | 0.01           | 6,753                 | 0.01           | 5,964              | 0.01           | 6,989               | 0.01           | 6,292               | 0.01           | 5,261                | 0.01           |
| Accumulibacter isolate UBA5574 | 6,600                 | 0.01           | 6,686                 | 0.01           | 5,256              | 0.01           | 6,188               | 0.01           | 6,113               | 0.01           | 5,054                | 0.01           |
| Accumulibacter isolate UBA2315 | 6,457                 | 0.01           | 6,205                 | 0.01           | 5,023              | 0.01           | 6,036               | 0.01           | 5,741               | 0.01           | 5,035                | 0.01           |
| Accumulibacter SK-12           | 6,309                 | 0.01           | 5,924                 | 0.01           | 4,657              | 0.01           | 5,890               | 0.01           | 5,592               | 0.01           | 4,818                | 0.01           |
